1 **Research Paper**

2 **Application of HPMCAS-coated Ctx(Ile<sup>21</sup>)-Ha peptide microparticles as a potential use to**  
3 **prevent systemic infection caused by *Salmonella* Enteritidis in poultry**

4

5 Cesar Augusto Roque Borda<sup>a</sup>, Mauro de Mesquita Souza Saraiva<sup>a</sup>, Daniel F. M. Monte<sup>a</sup>, Lucas  
6 Bocchini Rodrigues Alves<sup>a</sup>, Adriana Maria de Almeida<sup>a</sup>, Taísa Santiago Ferreira<sup>a</sup>, Túlio Spina de  
7 Lima<sup>a</sup>, Valdinete Pereira Benevides<sup>a</sup>, Julia Memrava Cabrera<sup>a</sup>, Andréia Bagliotti Meneguim<sup>b</sup>,  
8 Marlus Chorilli<sup>b</sup>, Angelo Berchieri Junior<sup>a</sup>, Eduardo Festozo Vicente<sup>c</sup>

9

10 **Author Affiliation(s)**

11 <sup>a</sup>São Paulo State University (UNESP), School of Agricultural and Veterinarian Sciences,  
12 Jaboticabal, São Paulo – Brazil;

13 <sup>b</sup>São Paulo State University (UNESP), School of Pharmaceutical Sciences, Araraquara, São  
14 Paulo – Brazil. CEP 14801-902.

15 <sup>c</sup>São Paulo State University (UNESP), School of Sciences and Engineering, Tupã, São Paulo –  
16 Brazil.

17

18

19 **\*Address for correspondence:**

20 \*Eduardo Festozo Vicente

21 São Paulo State University (UNESP), School of Sciences and Engineering, Tupã, São Paulo –  
22 Brazil. E-mail: eduardo.vicente@unesp.br

23 Phone: +551434044262

24 **ABSTRACT**

25 The transmission of *Salmonella* Enteritidis (SE) in poultry is most often by the fecal-oral route,  
26 which can be attributed to the population density. Consequently, the pathogen triggers stress  
27 response and virulence factors deploying it to survive in hosts. Therefore, this study proposed to  
28 evaluate HPMCAS-coated microparticles containing the Ctx(Ile<sup>21</sup>)-Ha antimicrobial peptide  
29 against SE in laying hens chicks' infection model to determine whether Ctx(Ile<sup>21</sup>)-Ha-utilization  
30 confers a benefit in the intestinal lumen, as well as whether limits systemic infection.  
31 Importantly, while assessing whether AMP utilization confers reduction of SE in liver, it was  
32 noted that there was statistical significance between groups A (control, no Ctx(Ile<sup>21</sup>)-Ha peptide)  
33 and B (2.5 mg of Ctx(Ile<sup>21</sup>)-Ha/kg) at 2 dpi, potentially indicating the Ctx(Ile<sup>21</sup>)-Ha effectiveness  
34 in the first stage of infection by SE. Remarkably, it was also detected a statistical significance  
35 ( $p$ -value <0.0001) with lower counts of SE (~ 0 CFU) in livers at 5, 7, and 14 dpi, regardless of  
36 Ctx(Ile<sup>21</sup>)-Ha dosage (2.5 mg or 5 mg/kg - group C). By using Chi-square test, the AMP effect  
37 on SE fecal excretion was evaluated. In this regard, it was noticed statistical significance ( $p$  <  
38 0.05) among groups B and C in comparison with control group A, since those groups had lower  
39 bacterial excretion along 21 days. In summary, the role of HPMCAS-Ctx(Ile<sup>21</sup>)-Ha peptide  
40 microcapsules against *S. Enteritidis* in laying hen chicks infection model was unraveled,  
41 providing a satisfactory results against this pathogen.

42

43 **Keywords:** Antimicrobial peptides; microparticles; poultry; *Salmonella* Enteritidis, systemic  
44 infection.

45

46

## 47 **Introduction**

48 *Salmonella enterica* subsp. *enterica* serovar Enteritidis is one of the leading cause of  
49 foodborne diseases posing global concerns to one health and economy <sup>1-3</sup>. In this concern,  
50 several efforts have been made to reduce the contamination and spread of *Salmonella* Enteritidis  
51 along the poultry production chain, since this serovar is most often associated with poultry  
52 products <sup>4,5</sup>. Besides that, the overuse of antimicrobial agents in animal husbandry, have  
53 contributed to the emergence of virulent and multidrug resistant (MDR) strains among poultry  
54 products, which represents a critical public health issue, once it could have implications on  
55 human health <sup>2,6,7</sup>.

56 The increasing spread of virulent and MDR strains have imposed the poultry production  
57 sector to decrease the use of antimicrobial agents and simultaneously to find alternative solutions  
58 to mitigate such pathogen <sup>8,9</sup>. Among these mitigation strategies, the use of non-conventional  
59 drugs such as antimicrobial peptides (AMPs) has been recognized to have anti-*Salmonella* effect,  
60 not only for MDR strains, but especially against high virulent *Salmonella*. These promising  
61 AMPs are molecules that are able to modulate the immune response, which protect hosts against  
62 invasive infections <sup>8,9</sup>.

63 Antimicrobial peptides triggers destabilization of bacterial cell membrane preventing  
64 their growth, which could possibly inhibit the lethality of *Salmonella* spp. Consequently, the  
65 antibacterial mechanisms of AMPs have become a research hotspot <sup>3</sup>. Interestingly, gut  
66 inflammation provides a growth advantage for *Salmonella*, contributing to becoming this  
67 pathogen more harmful <sup>10,11</sup>. Indeed, the virulence package plays a crucial role in invasive non-  
68 typhoidal *Salmonella* (NTS) infections, favoring their growth and survival in hosts <sup>10,11</sup>.

69 Therefore, this work proposed to evaluate the HPMCAS-coated microparticles of Ctx(Ile<sup>21</sup>)-Ha  
70 peptide against *S. Enteritidis* in laying hen chicks infection model to determine whether  
71 Ctx(Ile<sup>21</sup>)-Ha-utilization confers a benefit in the intestinal lumen, as well as whether limits  
72 systemic infection.

73

## 74 **Materials and methods**

### 75 **Chemical agents**

76 Hypromellose Acetate Succinate (HPMCAS, AQOAT® - Grade AS-LF; Shin-Etsu  
77 Chemical Co., Ltd), Fmoc-aminoacids, Rink Amide resin, *N,N'*-Diisopropylcarbodiimide (DIC;  
78 CAS No. 693-13-0), Hydroxybenzotriazole (HOBt; PubChem SID 57651485),  
79 Hexahydropyridine (CAS No. 110-89-4), Trifluoroacetic acid (TFA; CAS Number: 76-05-1),  
80 Triisopropylsilane (TIS; #233781) and Acetonitrile (ACN; #34851) in High performance liquid  
81 chromatography (HPLC)/analytical grade and Phosphate-buffered saline (PBS; #P5493) were  
82 purchased from Sigma-Aldrich.

83 Dimethylformamide (DMF; Neon Comercial #01114), dichloromethane (DCM; Anidrol  
84 Products Laboratories #PAP.A-1986), sodium alginate (#3913.10.00) and aluminum chloride  
85 (#2827.32.00) were obtained from Êxodo Científica, Brilliant Green agar (BGA; K25-610009)  
86 culture medium and selenite cystine broth (SCB; K25-610150) were purchased KASVI, Sodium  
87 Biselenite (#2030) was acquired from INLAB, MacConkey agar (MC; #CM0007B) and BD  
88 Difco™ LB Broth (LB; # DF0402-07-0) was obtained from Fisher Scientific.

89

### 90 **Ctx(Ile<sup>21</sup>)-Ha antimicrobial peptide assembly**

91 Ctx(Ile<sup>21</sup>)-Ha (MW = 2,289.72 g mol<sup>-1</sup>) was synthesized in solid phase manually and  
92 characterized as previously described <sup>12</sup>. Briefly, all amino acids and resin were protected with  
93 fluorenylmethoxycarbonyl  $\alpha$ -aminic protecting group (Fmoc) <sup>13</sup>. Rink amide resin (degree of  
94 substitution = 0.6 mmol g<sup>-1</sup>) was employed as the solid support for the peptide synthesis,  
95 presented by the following sequence GWLDVAKKIGKAAFSVAKSFI-NH <sup>14</sup>. Fmoc-amino  
96 acids were coupled for 2 h with DIC/HOBt (0,6 equivalents) previously dissolved on ultrasound  
97 in 1:1 DMF/DCM. Afterwards, the protector was removed with 2:8 Hexahydropyridine/DMF to  
98 able the coupling of the next amino acid.

99 Once the peptide construction was concluded, the resin was separated from the peptide,  
100 using a cleavage solution of 95% TFA, 2.5% TIS, and 2.5% water and stirred for 2 h at room  
101 temperature. The solution was precipitated three times with cold diethyl ether and both phases  
102 were separated with a Pasteur pipette, manually, centrifuged, and drying in the desiccator with  
103 silica beads. For the extraction of the peptide, were used HPLC mobile phases to solubilize the  
104 crude peptide, which was lyophilized after the process. Ctx(Ile<sup>21</sup>)-Ha identification was  
105 performed by HPLC (Shimadzu with membrane degasser DGU-20A5R, UV detector SPD-20A,  
106 column oven CTO-20A, automatic sampler SIL-10AF, fraction collector FRC-10A and LC-  
107 20AT dual-pump, C18 column) and characterization by Mass Spectrometry (Bruker Amazon,  
108 Brazil), using a mobile phases proportion of A (0.045% TFA/H<sub>2</sub>O) and B (0.036% TFA/ACN),  
109 1:1, v/v, at 220/280 nm wavelength detection.

110

### 111 **Obtaining of HPMCAS-coated microparticles**

112 *Ionic gelation* <sup>15</sup>: 2% sodium alginate aqueous solution was homogenized with Ctx(Ile<sup>21</sup>)-  
113 Ha peptide for 4 h, until complete dissolution. Then, using a pump and a syringe, the alginate

114 was cross-linked dropwise in aluminum chloride and they were placed in a drying oven for 6 h at  
115 40°C. Crosslinking solutions had the final concentrations of peptide: B = 0.2 g L<sup>-1</sup> and C = 0.4 g  
116 L<sup>-1</sup>.

117 *Enteric coating*<sup>16</sup>: The microparticles obtained were placed in a fluidized bed at 40°C,  
118 with a peristaltic pump speed of 0.4 mL min<sup>-1</sup>, system vibration at 100%, and a 0.25 L min<sup>-1</sup>  
119 blower. The enteric coating solution was prepared with HPMCAS, ammonium hydroxide,  
120 triethylcitrate and water (1:2.5:0.25:6.25, w/v).

121

## 122 **Bacterial strain**

123 The *Salmonella* Enteritidis strain P125109 (accession number AM933172.1) used in this  
124 study was isolated from an outbreak of human food poisoning in the United Kingdom<sup>17,18</sup>. The  
125 stock culture of SE strain kept at -80°C was aerobically cultured at 37°C in Lysogeny Broth  
126 (LB) for 18 h. After incubation, an aliquot (100 µL) was serially diluted (1:10) in Phosphate  
127 Buffered Saline pH 7.4 (PBS) and inoculated onto LB agar plates. Thereafter, the inoculum of  
128 SE strain was maintained approximately at 10<sup>8</sup> CFU cell suspension before oral infection.

129

## 130 **Ethical statements and *in vivo* assays**

131 *In vivo* experiments were performed according to the Ethical Principles on Animal  
132 Experimentation (CEUA) of the National Council for the Control of Animal Experimentation  
133 (CONCEA). The protocol was approved by the Ethical Committee on Animal Experimentation  
134 from the School of Agriculture and Veterinarian Sciences (FCAV) at August, 25<sup>th</sup> 2020  
135 (Protocol number: 2588/20). Experimental assays were carried out in the Department of  
136 Pathology, Theriogenology, and One Health at São Paulo State University (FCAV/UNESP).

137 To determine whether AMPs' utilization confers protection against *Salmonella*  
138 Enteritidis, one hundred and twenty laying hen chicks were obtained from a commercial  
139 hatchery. Upon arrival, the presence of *Salmonella* spp. was investigated by using cloacal swab,  
140 as well as drag swab of transport cardboard boxes <sup>19</sup>. Samples were dispensed in sterile Selenite  
141 Broth containing 0.04% of Novobiocin (SN – Becton Dickinson, Maryland, USA) and incubated  
142 at 37°C for 24h. Afterwards, they were inoculated onto MacConkey and Brilliant Green agar,  
143 subsequently being incubated at 37°C for 24h.

144 Next, randomly distributed 40 laying hen chicks per group, including control group A (no  
145 Ctx(Ile<sup>21</sup>)-Ha; n=40), B (2.5 mg of Ctx(Ile<sup>21</sup>)-Ha/kg; n=40), and C (5 mg of Ctx(Ile<sup>21</sup>)-Ha/kg;  
146 n=40) were performed. Laying hen chicks were orally infected with 0.2 mL (10<sup>8</sup> CFU/mL) of *S.*  
147 Enteritidis.

148 Chicks were euthanized 2, 5, 7, 14, 21 days after infection. Cecal contents were  
149 collected for enumeration of SE, whereas liver and spleen were collected to evaluate the  
150 systemic infection, also by using bacterial counts. *S. Enteritidis* counts were determined by  
151 plating serial ten-fold dilutions onto BG agar, supplemented with nalidixic acid (100 µg/mL) and  
152 spectinomycin (100 µg/mL).

153

#### 154 **Fecal excretion**

155 Fifteen chicks were randomly selected and subjected to cloacal swabs, which were  
156 performed twice a week during 21 days period. The collected cloacal swabs were dispensed in 2  
157 mL of SN Broth and incubated for 24 h at 37°C. Subsequently, they were streaked onto BG agar  
158 (BGA – Oxoid, UK) containing 100 µg/mL of nalidixic acid and 100 µg/mL of spectinomycin  
159 being incubated for 24 hours at 37°C. Presumptive colonies of *Salmonella* spp. were confirmed

160 positives by tests performed in slide agglutination using *Salmonella* O Poly Antisera (anti-O –  
161 Bio-Rad, USA).

162

### 163 **Statistical analysis**

164 Fisher's exact test was used to compare *Salmonella* excretion on the feces between the  
165 groups ( $P < 0.05$ ). While the logarithmically transformed values for bacterial counts from cecal  
166 content, liver, and spleen, were submitted to two-way ANOVA followed by Bonferroni multiple  
167 comparison test ( $P < 0.05$ ). All statistical analyses were performed using the software GraphPad  
168 Prism, version 8.2.1.

169

### 170 **Results**

#### 171 **Ctx(Ile<sup>21</sup>)-Ha synthesis and microparticles results**

172 HPLC and LC/MS analyzes and microparticles characterization and physicochemical  
173 stability were previously published elsewhere <sup>12</sup>.

174 Stable and light yellow microparticles were obtained (shown in [Figure 1](#)), total mass of  
175 20.05 and 20.01 g of non-coated microparticles, and 24.51 and 23.96 g of HPMCAS-coated  
176 microparticles, for B and C, respectively. The microparticles obtained had an average size of 2  
177 mm, which served not to be very different from common poultry food and was not visibly  
178 rejected or preferred for them. The mean final concentration of each coated capsule was 3.1 and  
179 6.3  $\mu\text{g}$  Ctx(Ile<sup>21</sup>)-Ha per mg of microparticles for B and C, respectively.

180

#### 181 **Effect of Ctx(Ile<sup>21</sup>)-Ha antimicrobial peptide on *Salmonella* Enteritidis cecal colonization**



182 While assessing whether Ctx(Ile<sup>21</sup>)-Ha AMP utilization confers protection against *S.*  
183 Enteritidis, it was evidenced statistical difference in ceacal content only in 5 days post infection  
184 (dpi), where A (control group) had higher counts of SE when compared with groups B ( $p$ -value =  
185 0.0392) and C ( $p$ -value = 0.0056) according to Bonferroni's multiple comparisons (BMC) test as  
186 summarized in [Figure 2](#). It was also noted higher counts of SE in ceacal content of the group A  
187 in comparison with B and C in 14 dpi, but this difference did not reach statistical significance  
188 ([Figure 2](#)).

189

### 190 **Contribution of the Ctx(Ile<sup>21</sup>)-Ha to avoid *Salmonella* Enteritidis systemic infection**

191 Similarly, for systemic infection analysis, it was seen statistical significance of group C in  
192 5 ( $p$ -value = 0.0095) and 14 ( $p$ -value = 0.0103) dpi compared to the control group (A), which  
193 demonstrated that 5 mg of Ctx(Ile<sup>21</sup>)-Ha AMP can reduce the bacterial counts in spleen ([Figure](#)  
194 [3](#)). In addition, two-way ANOVA test showed significant difference as bacterial count between  
195 the treatments of each group (Interaction  $p$ -value = 0.0262, Row Factor  $p$ -value = 0.0005,  
196 Column Factor  $p$ -value = 0.1772).

197 Importantly, while assessing whether AMPs utilization confers reduction of *S. Enteritidis*  
198 in liver, it was noted that there was statistical significance (A vs. B,  $p$ -value <0.0001; B vs. C,  $p$ -  
199 value = 0.0021) between groups B and A at 2 dpi, potentially indicating the Ctx(Ile<sup>21</sup>)-Ha  
200 effectiveness in the first stage of infection by *S. Enteritidis* ([Figure 4](#)). Remarkably, it was also  
201 evidenced a statistical significance ( $p$ -value <0.0001) with lower counts of SE (~ 0 CFU) in  
202 livers at 5, 7, and 14 dpi, regardless of Ctx(Ile<sup>21</sup>)-Ha dosage (2.5 mg or 5 mg), as shown in  
203 [Figure 4](#).

204 Additionally, two-way ANOVA showed a significant difference in all groups (Interaction  
205  $p$ -value = 0.0062, Row Factor  $p$ -value <0.0001, Column Factor  $p$ -value <0.0001), which  
206 confirms this anti-Systemic Infection potential against SE.

207

## 208 **Fecal excretion**

209 By using Chi-square test, the effect of Ctx(Ile<sup>21</sup>)-Ha antimicrobial peptide on *S.*  
210 Enteritidis fecal excretion was evaluated. In this regard, it was noticed statistical significance ( $p$   
211 < 0.05) among groups B and C in comparison with control group A, since those groups had  
212 lower bacterial excretion along 21 days, as shown in [Figure 5](#).

213

## 214 **Discussion**

215 Peptides and proteins are biomolecules that require special attention when used as oral  
216 drugs, because they must travel throughout the gastrointestinal tract (GIT). Due to this, they can  
217 be easily denatured, deactivated or hydrolyzed by the presence of proteases or an acid  
218 environment (low pH)<sup>20</sup>. It has been shown that in the gastric tract (pH ~ 1-3), the main problem  
219 with peptides would be related to the presence of pepsin (10 – 15 % hydrolysis). In this way, due  
220 to constant shear, its stability would be completely affected. In addition, the enzymes present in  
221 the intestine (trypsin, chymotrypsin, aminopeptidase, etc.) would be responsible for the total  
222 breakdown of peptide bonds<sup>20,21</sup>. The challenges in the transport of the AMPs through the GIT  
223 made this treatment not entirely efficient<sup>22</sup>.

224 HPMCAS is a pH-dependent biopolymer, resistant to pH-acid, so the Ctx(Ile<sup>21</sup>)-Ha  
225 peptide was protected during its passage through the stomach. However, in the intestinal pH,  
226 HPMCAS is totally soluble and the coating entirely dissolves<sup>16</sup>. Carboxyl radicals in solution

227 help the temporary inactivation of GIT enzymes, which can chelate metals used as cofactor i.e.,  
228  $Mg^{+2}$  and  $Ca^{+2}$  <sup>23,24</sup>. Most of the enzymatic factors were solved using HPMCAS and alginate,  
229 because they have several carboxyl radicals in their chemical structure (Figure 6).

230 Intestinal absorption of AMP (Figure 6), due to its size, low permeability and the physical  
231 barriers of the mucosa, could be an obstacle <sup>25,26</sup>. However, it has been shown that the use of  
232 biopolymers could allow these molecules to pass through these compartments without difficulty.  
233 In this way, use of polymers with mucoadhesive and mucopenetration capacity are necessary <sup>27</sup>.  
234 In a previous study, the absorption of insulin, which has a molecular weight even higher than that  
235 of the Ctx(Ile<sup>21</sup>)-Ha peptide, was achieved using the same ionic gelation techniques, with a  
236 combined pectin/retrograded starch system, which successfully crossed the paracellular pathway  
237 and was demonstrated that polymeric microparticles are capable of opening tightness of tight  
238 junctions facilitating the transport of peptides <sup>28</sup>.

239 In this investigation, the system was favored by the mucoadhesive <sup>29</sup>, mucopenetration  
240 ability <sup>30</sup>, and biocompatibility of the alginate <sup>31</sup>, increasing the bioavailability of the peptide <sup>32</sup>.  
241 Furthermore, previous studies indicate that HPMCAS was able to improve permeation through  
242 monolayers of human colon adenocarcinoma cells (Caco-2) and dialysis membranes <sup>33</sup>. This  
243 polymer was also able to inhibit the crystallization of drugs (mainly by succinyl groups) and to  
244 keep them stable in a solid phase dispersion <sup>34,35</sup>. This evidence corroborates the results obtained  
245 regarding the Ctx(Ile<sup>21</sup>)-Ha peptide mechanism of action in the liver and could explain the high  
246 rate of bacterial elimination.

247 AMPs have several mechanisms of interaction with the cell membrane  
248 lipopolysaccharides that manage to destabilize the bacteria, reaching a high biological potential,  
249 even with MDR bacteria <sup>36</sup>. Ctx(Ile<sup>21</sup>)-Ha belongs to the ceratotoxins' family, originally isolated

250 from the skin of a Brazilian Cerrado frog <sup>37</sup>. Previous studies indicated potential antimicrobial  
251 activity against SE and *Salmonella enterica* subsp. *enterica* serovar Typhimurium (ST) and other  
252 MDR bacteria <sup>12</sup>.

253 Other AMPs were studied to inhibit the replication of *Salmonella* sp., such as  
254 cathelicidin-BF, which demonstrated an anti-ST effect in murine with a Minimum Inhibitory  
255 Concentration (MIC) of 1.1 mol L<sup>-1</sup> <sup>22</sup>. However, no values were shown for anti-SE, being more  
256 efficient results compared to anti-ST (64 µg mL<sup>-1</sup>) of Ctx(Ile<sup>21</sup>)-Ha <sup>12</sup>.

257 Ctx(Ile<sup>21</sup>)-Ha has also anti-SE MIC values of 4 mol L<sup>-1</sup>, better than indolicidin AMP (8,4  
258 mol L<sup>-1</sup>). Therefore, its potential is maintained. Furthermore, human cathelicidin LL-37, a largely  
259 studied peptide with potential activity, showed low anti-ST activity (28 mol L<sup>-1</sup>), but did not  
260 show anti-SE activity. Ctx(Ile<sup>21</sup>)-Ha demonstrated better anti-SE results when compared to  
261 conventional drugs, such as Chlortetracycline (36 mol L<sup>-1</sup>) and Neomycin (13 mol L<sup>-1</sup>) <sup>38</sup>.  
262 However, such studies remain scarce. In this regard, this study proposes a novel product with  
263 combined techniques from food chemistry and biotechnology and pharmaceutical fields.

264 Notably, *S. Enteritidis* remains one of the most important pathogens associated with  
265 poultry products <sup>4,5</sup>. In this regard, several efforts made by poultry industry have been reduced  
266 the cross-contamination along the food chain. Consequently, these mitigation strategies have  
267 benefited the human health by avoiding the food poisoning caused by this high priority pathogen.  
268 Despite this, the development of new efficient antimicrobials is still scarce <sup>39</sup>. In this concern,  
269 antimicrobial peptides have been recognized as a viable alternative against pathogenic bacteria  
270 <sup>40</sup>. However, in some circumstances, virulent lineages are able to colonize the ceca environment  
271 and may also spread through liver, spleen, and heart, causing systemic infection <sup>41</sup>. Presumably,  
272 this statement corroborates our findings, since chicks with no AMP treatment (group A)

273 substantially presented more bacterial counts than treated chicks (groups B and C). Therefore,  
274 this study could provide the potential use of Ctx(Ile<sup>21</sup>)-Ha antimicrobial peptide to reduce *S.*  
275 Enteritidis counts in chicken infection model.

276 One of the most important aspects related to the successful application of this HPMCAS  
277 against *S.* Enteritidis, is most likely regarding to the high mechanical resistance <sup>42</sup> and  
278 insolubility in gastric pH of the molecule, which could guarantee the fully release of Ctx(Ile<sup>21</sup>)-  
279 Ha peptide <sup>15</sup>.

280 Besides, increasing evidences have demonstrated that treatment with AMPs would  
281 generate a better immune response during the first 5 days of life <sup>43,44</sup>. The use of AMPs, such as  
282 bacteriocins in poultry production, could prevent reinfection <sup>45</sup>, through factors that advance the  
283 immune response <sup>46</sup>. Therefore, our results corroborate the decrease in bacterial load with a  
284 significant difference in the intestine in the first days after infection (5 dpi), as shown in [Figure](#)  
285 [2](#).

286 Care in food handling and animal production should be a priority, without using drugs  
287 excessively, since *Salmonella* as well as other bacteria are prone to the acquisition of bacterial  
288 resistance and consequently produce a reinfection with more serious effects <sup>47,48</sup>. However, the  
289 presented results of fecal excretion showed a relevant significant difference since the complete  
290 elimination of SE was achieved from a large number of chickens, without the presence of  
291 reinfection. This arises a different vision of the use of these biopharmaceutical additives that  
292 could replace conventional drugs to control the systemic infection of SE and other subspecies,  
293 with minimal risk of bacterial resistance.

294

295 **Conclusions**

296 Collectively, these data demonstrated that the use of formulated antimicrobial peptides,  
297 particularly the Ctx(Ile<sup>21</sup>)-Ha, could be a promising alternative against systemic infections  
298 caused by *S. Enteritidis*, deserving to be more explored against other *Salmonella enterica*  
299 serovars. To the best of our knowledge, this is the first report of an Ctx(Ile<sup>21</sup>)-Ha peptide that  
300 displayed satisfactory results against *S. Enteritidis* in laying hen chicks' infection model. This  
301 outcome might be useful at animal husbandry as a plausible alternative with anti-*Salmonella*  
302 effect.

303

#### 304 **Disclosure statement**

305 No potential conflict of interest was reported by authors.

306

#### 307 **Data Availability statement**

308 The data that support the findings of this study are openly available in Mendeley Data at  
309 <http://doi.org/10.17632/cgkt7pxj2n.1>

310

#### 311 **Acknowledgments**

312 This work was developed with the support of São Paulo Research Foundation/FAPESP  
313 (Process number 2016/00446-7) and master scholarship (Process number 2018/25707-3). We  
314 thank the technical assistants of Laboratory of Chemistry and Biochemistry from São Paulo State  
315 University (Unesp), School of Sciences and Engineering, Tupã; University of Araraquara which  
316 made available the use of the fluidized-bed equipment and Shin-Etsu company for gently donate  
317 and provide the HPMCAS coating for the experiments. Finally, the research group "Peptides:  
318 Synthesis, Optimization and Applied Studies - PeSEAp". This work is a chapter of master's

319 thesis and is also part of the national patent protected throughout the Brazilian territory by the  
320 National Institute of Intellectual Property (INPI BR1020200220489).

321 **REFERENCES**

- 322 1. Majowicz SE, Musto J, Scallan E, Angulo FJ, Kirk M, O'Brien SJ, Jones TF, Fazil A,  
323 Hoekstra RM. The global burden of nontyphoidal salmonella gastroenteritis [Internet].  
324 Clin. Infect. Dis. 2010 [cited 2021 Mar 8]; 50:882–9. Available from:  
325 <https://academic.oup.com/cid/article-lookup/doi/10.1086/650733>
- 326 2. Campioni F, Gomes CN, Rodrigues D dos P, Bergamini AMM, Falcão JP. Phenotypic  
327 analyses of Salmonella enterica serovar Enteritidis strains isolated in the pre- and post-  
328 epidemic period in Brazil. Brazilian J Microbiol [Internet] 2020 [cited 2021 Mar 8]; :1–  
329 11. Available from: <https://link.springer.com/article/10.1007/s42770-020-00392-0>
- 330 3. Arunima A, Swain SK, Patra SD, Das S, Mohakud NK, Misra N, Suar M. Role of OB-  
331 fold protein ydei in stress response and virulence of salmonella enterica serovar  
332 enteritidis. J Bacteriol [Internet] 2020 [cited 2021 Mar 8]; 203. Available from:  
333 <https://jb.asm.org/content/203/1/e00237-20>
- 334 4. de Freitas Neto OC, Galdino VMCA, Campello PL, de Almeida AM, Fernandes SA,  
335 Berchieri Júnior A. Salmonella serovars in laying hen flocks and commercial table eggs  
336 from a region of São Paulo state, Brazil. Rev Bras Cienc Avic [Internet] 2014 [cited 2021  
337 Mar 8]; 16:57–62. Available from: <http://dx.doi.org/10.1590/1516-635x160257-62>
- 338 5. Antunes P, Mourão J, Campos J, Peixe L. Salmonellosis: The role of poultry meat. Clin  
339 Microbiol Infect [Internet] 2016; 22:110–21. Available from:  
340 <http://dx.doi.org/10.1016/j.cmi.2015.12.004>
- 341 6. de Freitas Neto OC, Penha Filho RAC, Barrow P, Berchieri J. Sources of human non-  
342 typhoid salmonellosis: A review. Rev Bras Cienc Avic [Internet] 2010 [cited 2021 Mar 8];  
343 12:1–11. Available from: [http://www.scielo.br/scielo.php?script=sci\\_arttext&pid=S1516-](http://www.scielo.br/scielo.php?script=sci_arttext&pid=S1516-)



- 344 635X2010000100001&lng=en&nrm=iso&tlng=en
- 345 7. Andino A, Hanning I. Salmonella enterica: Survival, colonization, and virulence  
346 differences among serovars. Sci. World J.2015; 2015.
- 347 8. Mahlapuu M, Håkansson J, Ringstad L, Björn C. Antimicrobial Peptides: An Emerging  
348 Category of Therapeutic Agents. Front Cell Infect Microbiol [Internet] 2016; 6. Available  
349 from: <http://journal.frontiersin.org/article/10.3389/fcimb.2016.00194/full>
- 350 9. Tsai W-C, Zhuang Z-J, Lin C-Y, Chen W-J. Novel antimicrobial peptides with promising  
351 activity against multidrug resistant *Salmonella enterica* serovar Choleraesuis and its stress  
352 response mechanism. J Appl Microbiol [Internet] 2016 [cited 2021 Mar 8]; 121:952–65.  
353 Available from: <http://doi.wiley.com/10.1111/jam.13203>
- 354 10. Winter SE, Thiennimitr P, Winter MG, Butler BP, Huseby DL, Crawford RW, Russell  
355 JM, Bevins CL, Adams LG, Tsolis RM, et al. Gut inflammation provides a respiratory  
356 electron acceptor for Salmonella. Nature [Internet] 2010 [cited 2021 Mar 8]; 467:426–9.  
357 Available from: <https://www.nature.com/articles/nature09415>
- 358 11. Faber F, Thiennimitr P, Spiga L, Byndloss MX, Litvak Y, Lawhon S, Andrews-Polymenis  
359 HL, Winter SE, Bäumlér AJ. Respiration of Microbiota-Derived 1,2-propanediol Drives  
360 Salmonella Expansion during Colitis. PLOS Pathog [Internet] 2017 [cited 2021 Mar 8];  
361 13:e1006129. Available from: <https://dx.plos.org/10.1371/journal.ppat.1006129>
- 362 12. Roque Borda CA, Leite Silva HR, Junior EC, Serafim JA, Meneguim AB, Chorilli M,  
363 Macedo Costa W, Rainho Teixeira S, Lopes Guastalli EA, Soares NM, et al. Alginate-  
364 based microparticles coated with HPMCP/AS cellulose-derivatives enable the Ctx(Ile21)-  
365 Ha antimicrobial peptide application as a feed additive. bioRxiv [Internet] 2021;  
366 :2021.03.16.435719. Available from:

- 367 <https://www.biorxiv.org/content/10.1101/2021.03.16.435719v1>
- 368 13. Carpino LA, Han GY. The 9-Fluorenylmethoxycarbonyl Amino-Protecting Group. *J Org*  
369 *Chem* [Internet] 1972 [cited 2021 Mar 12]; 37:3404–9. Available from:  
370 <https://pubs.acs.org/doi/abs/10.1021/jo00795a005>
- 371 14. Vicente EF, Basso LGM, Cespedes GF, Lorenzón EN, Castro MS, Mendes-Giannini MJS,  
372 Costa-Filho AJ, Cilli EM. Dynamics and Conformational Studies of TOAC Spin Labeled  
373 Analogues of Ctx(Ile21)-Ha Peptide from *Hypsiboas albopunctatus*. *PLoS One* [Internet]  
374 2013 [cited 2020 Jul 10]; 8:e60818. Available from:  
375 <https://dx.plos.org/10.1371/journal.pone.0060818>
- 376 15. Deladino L, Anbinder PS, Navarro AS, Martino MN. Encapsulation of natural  
377 antioxidants extracted from *Ilex paraguariensis*. *Carbohydr Polym* 2008; 71:126–34.
- 378 16. Tanno F, Nishiyama Y, Kokubo H, Obara S. Evaluation of Hypromellose Acetate  
379 Succinate (HPMCAS) as a Carrier in Solid Dispersions. *Drug Dev Ind Pharm* [Internet]  
380 2004 [cited 2021 Feb 10]; 30:9–17. Available from:  
381 <https://www.tandfonline.com/doi/abs/10.1081/DDC-120027506>
- 382 17. Barrow PA. Experimental infection of chickens with *Salmonella enteritidis*. *Avian Pathol*  
383 [Internet] 1991 [cited 2021 Mar 8]; 20:145–53. Available from:  
384 <https://www.tandfonline.com/action/journalInformation?journalCode=cavp20>
- 385 18. Barrow PA, Lovell MA. Experimental infection of egg-laying hens with *Salmonella*  
386 *enteritidis* phage type 4. *Avian Pathol* [Internet] 1991 [cited 2021 Mar 8]; 20:335–48.  
387 Available from:  
388 <https://www.tandfonline.com/action/journalInformation?journalCode=cavp20>
- 389 19. Zancan FT, Berchieri A, Fernandes SA, Queiroz Gama NMS. *Salmonella* spp

- 390 investigation in transport boxes of day-old birds. *Brazilian J Microbiol* [Internet] 2000  
391 [cited 2021 Mar 8]; 31:230–2. Available from:  
392 [http://www.scielo.br/scielo.php?script=sci\\_arttext&pid=S1517-](http://www.scielo.br/scielo.php?script=sci_arttext&pid=S1517-83822000000300016&lng=en&nrm=iso&tlng=en)  
393 [83822000000300016&lng=en&nrm=iso&tlng=en](http://www.scielo.br/scielo.php?script=sci_arttext&pid=S1517-83822000000300016&lng=en&nrm=iso&tlng=en)
- 394 20. Mat DJL, Cattenoz T, Souchon I, Michon C, Le Feunteun S. Monitoring protein  
395 hydrolysis by pepsin using pH-stat: In vitro gastric digestions in static and dynamic pH  
396 conditions. *Food Chem* [Internet] 2018 [cited 2021 Mar 9]; 239:268–75. Available from:  
397 <http://dx.doi.org/10.1016/j.foodchem.2017.06.115>
- 398 21. Ye A, Cui J, Singh H. Proteolysis of milk fat globule membrane proteins during in vitro  
399 gastric digestion of milk. *J Dairy Sci* [Internet] 2011; 94:2762–70. Available from:  
400 <https://linkinghub.elsevier.com/retrieve/pii/S0022030211002633>
- 401 22. Xia X, Zhang L, Wang Y. The antimicrobial peptide cathelicidin-BF could be a potential  
402 therapeutic for *Salmonella typhimurium* infection. *Microbiol Res* [Internet] 2015 [cited  
403 2021 Jan 10]; 171:45–51. Available from:  
404 <https://linkinghub.elsevier.com/retrieve/pii/S0944501314001578>
- 405 23. Kriwet B, Kissel T. Interactions between bioadhesive poly(acrylic acid) and calcium ions.  
406 *Int J Pharm* 1996; 127:135–45.
- 407 24. Yin W, Sun H, Hong J, Cao S, Yang B, Won C, Song M. Effect of Ca selective chelator  
408 BAPTA as depressant on flotation separation of magnesite from dolomite. *Miner Eng*  
409 [Internet] 2019 [cited 2021 Mar 14]; 144. Available from:  
410 [www.elsevier.com/locate/mineng](http://www.elsevier.com/locate/mineng)
- 411 25. Bagliotti Meneguín A, Stringhetti Ferreira Cury B, Evangelista RC. Films from resistant  
412 starch-pectin dispersions intended for colonic drug delivery. *Carbohydr Polym* 2014;

- 413 99:140–9.
- 414 26. Rekha MR, Sharma CP. Oral delivery of therapeutic protein/peptide for diabetes-Future  
415 perspectives. *Int J Pharm* [Internet] 2013; 440:48–62. Available from:  
416 <http://dx.doi.org/10.1016/j.ijpharm.2012.03.056>
- 417 27. Tyagi P, Pechenov S, Anand Subramony J. Oral peptide delivery: Translational challenges  
418 due to physiological effects [Internet]. *J. Control. Release* 2018 [cited 2021 Mar 14];  
419 287:167–76. Available from: <https://doi.org/10.1016/j.jconrel.2018.08.032>
- 420 28. Meneguín AB, Beyssac E, Garrat G, Hsein H, Cury BSF. Retrograded starch/pectin  
421 coated gellan gum-microparticles for oral administration of insulin: A technological  
422 platform for protection against enzymatic degradation and improvement of intestinal  
423 permeability. *Eur J Pharm Biopharm* 2018; 123:84–94.
- 424 29. Ghumman SA, Noreen S, Muntaha S. *Linum usitatissimum* seed mucilage-alginate  
425 mucoadhesive microspheres of metformin HCl: Fabrication, characterization and  
426 evaluation. *Int J Biol Macromol* 2020; 155:358–68.
- 427 30. Taipaleenmäki E, Christensen G, Brodzkij E, Mouritzen SA, Gal N, Madsen S,  
428 Hedemann MS, Knudsen TA, Jensen HM, Christiansen SL, et al. Mucopenetrating  
429 polymer – Lipid hybrid nanovesicles as subunits in alginate beads as an oral formulation. *J*  
430 *Control Release* [Internet] 2020 [cited 2021 Mar 14]; 322:470–85. Available from:  
431 <https://doi.org/10.1016/j.jconrel.2020.03.047>
- 432 31. Wang S, Ju J, Wu S, Lin M, Sui K, Xia Y, Tan Y. Electrospinning of biocompatible  
433 alginate-based nanofiber membranes via tailoring chain flexibility. *Carbohydr Polym*  
434 2020; 230:115665.
- 435 32. Pedroso-Santana S, Fleitas-Salazar N. Ionotropic gelation method in the synthesis of

- 436 nanoparticles/microparticles for biomedical purposes. *Polym Int* [Internet] 2020 [cited  
437 2021 Feb 10]; 69:443–7. Available from:  
438 <https://onlinelibrary.wiley.com/doi/abs/10.1002/pi.5970>
- 439 33. Ueda K, Higashi K, Limwikrant W, Sekine S, Horie T, Yamamoto K, Moribe K.  
440 Mechanistic differences in permeation behavior of supersaturated and solubilized  
441 solutions of carbamazepine revealed by nuclear magnetic resonance measurements. *Mol*  
442 *Pharm* [Internet] 2012 [cited 2021 Mar 14]; 9:3023–33. Available from:  
443 <https://pubs.acs.org/sharingguidelines>
- 444 34. Ueda K, Higashi K, Yamamoto K, Moribe K. Inhibitory effect of hydroxypropyl  
445 methylcellulose acetate succinate on drug recrystallization from a supersaturated solution  
446 assessed using nuclear magnetic resonance measurements. *Mol Pharm* [Internet] 2013  
447 [cited 2021 Mar 14]; 10:3801–11. Available from: <https://pubs.acs.org/sharingguidelines>
- 448 35. Ueda K, Higashi K, Yamamoto K, Moribe K. The effect of HPMCAS functional groups  
449 on drug crystallization from the supersaturated state and dissolution improvement. *Int J*  
450 *Pharm* [Internet] 2014; 464:205–13. Available from:  
451 <http://dx.doi.org/10.1016/j.ijpharm.2014.01.005>
- 452 36. Gottler LM, Ramamoorthy A. Structure, membrane orientation, mechanism, and function  
453 of pexiganan — A highly potent antimicrobial peptide designed from magainin. *Biochim*  
454 *Biophys Acta - Biomembr* [Internet] 2009 [cited 2020 Nov 30]; 1788:1680–6. Available  
455 from: <https://linkinghub.elsevier.com/retrieve/pii/S0005273608003362>
- 456 37. Lorenzón EN, Cespedes GF, Vicente EF, Nogueira LG, Bauab TM, Castro MS, Cilli EM.  
457 Effects of Dimerization on the Structure and Biological Activity of Antimicrobial Peptide  
458 Ctx-Ha. *Antimicrob Agents Chemother* [Internet] 2012 [cited 2020 Oct 19]; 56:3004–10.

- 459 Available from: <http://aac.asm.org/>
- 460 38. Liu Y, Luan C, Xia X, An S, Wang Y. Antibacterial activity, cytotoxicity and mechanisms  
461 of action of cathelicidin peptides against enteric pathogens in weaning piglets. *Int J Pept*  
462 *Res Ther* 2011; 17:175–84.
- 463 39. Magana M, Pushpanathan M, Santos AL, Leanse L, Fernandez M, Ioannidis A, Giulianotti  
464 MA, Apidianakis Y, Bradfute S, Ferguson AL, et al. The value of antimicrobial peptides  
465 in the age of resistance. *Lancet Infect Dis* [Internet] 2020 [cited 2021 Feb 10]; 20:e216–  
466 30. Available from: <http://www.thelancet.com/article/S1473309920303273/fulltext>
- 467 40. Jenssen H, Hamill P, Hancock REW. Peptide antimicrobial agents. *Clin Microbiol Rev*  
468 2006; 19:491–511.
- 469 41. Camba SI, del Valle FP, Shirota K, Sasai K, Katoh H. Evaluation of 3-week-old layer  
470 chicks intratracheally challenged with *Salmonella* isolates from serogroup c1 (O:6,7) and  
471 *Salmonella* Enteritidis. *Avian Pathol* [Internet] 2020 [cited 2021 Jan 9]; 49:305–10.  
472 Available from: <https://www.tandfonline.com/doi/abs/10.1080/03079457.2020.1719280>
- 473 42. Deshpande TM, Quadir A, Obara S, Hoag SW. Impact of formulation excipients on the  
474 thermal, mechanical, and electrokinetic properties of hydroxypropyl methylcellulose  
475 acetate succinate (HPMCAS). *Int J Pharm* 2018; 542:132–41.
- 476 43. Kogut MH, Genovese KJ, He H, Swaggerty CL, Jiang Y. Modulation of chicken intestinal  
477 immune gene expression by small cationic peptides as feed additives during the first week  
478 posthatch. *Clin Vaccine Immunol* [Internet] 2013 [cited 2021 Jan 14]; 20:1440–8.  
479 Available from: <http://cvi.asm.org/>
- 480 44. He H, Lowry VK, Swaggerty CL, Ferro PJ, Kogut MH. In vitro activation of chicken  
481 leukocytes and in vivo protection against *Salmonella enteritidis* organ invasion and

- 482 peritoneal *S. enteritidis* infection-induced mortality in neonatal chickens by  
483 immunostimulatory CpG oligodeoxynucleotide. FEMS Immunol Med Microbiol [Internet]  
484 2005 [cited 2021 Jan 10]; 43:81–9. Available from:  
485 <https://academic.oup.com/femspd/article-lookup/doi/10.1016/j.femsim.2004.07.009>
- 486 45. Diez-Gonzalez F. Applications of Bacteriocins in Livestock. Curr Issues Intest Microbiol  
487 [Internet] 2007 [cited 2021 Jan 10]; 8:15. Available from: [www.caister.com/bacteria-plant](http://www.caister.com/bacteria-plant)
- 488 46. Mansour SC, Pena OM, Hancock REW. Host defense peptides: front-line  
489 immunomodulators. Trends Immunol [Internet] 2014 [cited 2020 Dec 9]; 35:443–50.  
490 Available from: <https://linkinghub.elsevier.com/retrieve/pii/S147149061400115X>
- 491 47. Parvej MS, Nazmul Hussain Nazir KHM, Bahanur Rahman M, Jahan M, Rahman Khan  
492 MF, Rahman M. Prevalence and characterization of multi-drug resistant Salmonella  
493 Enterica serovar Gallinarum biovar Pullorum and Gallinarum from chicken. Vet World  
494 [Internet] 2016 [cited 2021 Mar 9]; 9:65–70. Available from: [/pmc/articles/PMC4819353/](https://pubmed.ncbi.nlm.nih.gov/26819353/)
- 495 48. Silveira RF, Roque Borda CA, Vicente EF. Antimicrobial peptides as a feed additive  
496 alternative to animal production, food safety and public health implications: an overview.  
497 Anim Nutr 2021; 7.
- 498
- 499

500 **Figure legends**

501

502 **Figure 1.** **A.** Microcapsules in solution after ionic gelation. **B.** Pre-dried isolated non-  
503 encapsulated microparticles. **C.** B-microparticles coated with HPMCAS of Ctx(Ile<sup>21</sup>)-Ha peptide  
504 (3.1 µg/mg). **D.** C-microparticles coated with HPMCAS of Ctx(Ile<sup>21</sup>)-Ha peptide (6.3 µg/mg).

505

506 **Figure 2.** Effect of antimicrobial peptides on *Salmonella* Enteritidis cecal colonization.

507

508 **Figure 3.** Effect of antimicrobial peptides on *Salmonella* Enteritidis spleen infection.

509

510 **Figure 4.** Effect of antimicrobial peptides on *Salmonella* Enteritidis liver infection.

511

512 **Figure 5.** Evaluation of the effect of antimicrobial peptides on *Salmonella* Enteritidis fecal  
513 excretion during 21 days.

514

515 **Figure 6.** Brief explanation of the absorption pathway and antibacterial activity of the  
516 antimicrobial peptide Ctx(Ile<sup>21</sup>)-Ha.

517

518

519

520

521

522



523

524

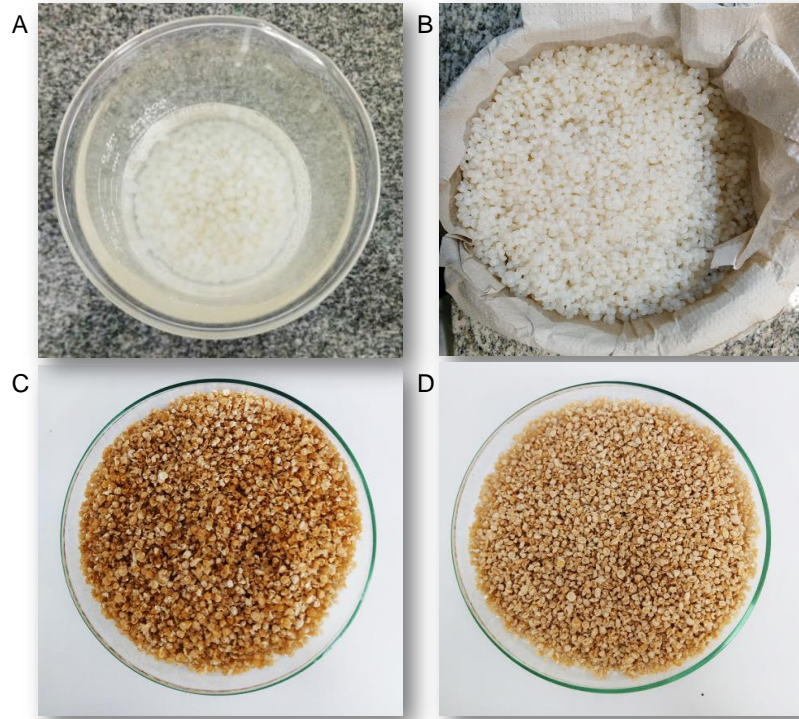

525

526 **Figure 1**

527

528

529

530

531

532

533

534

535

536

537

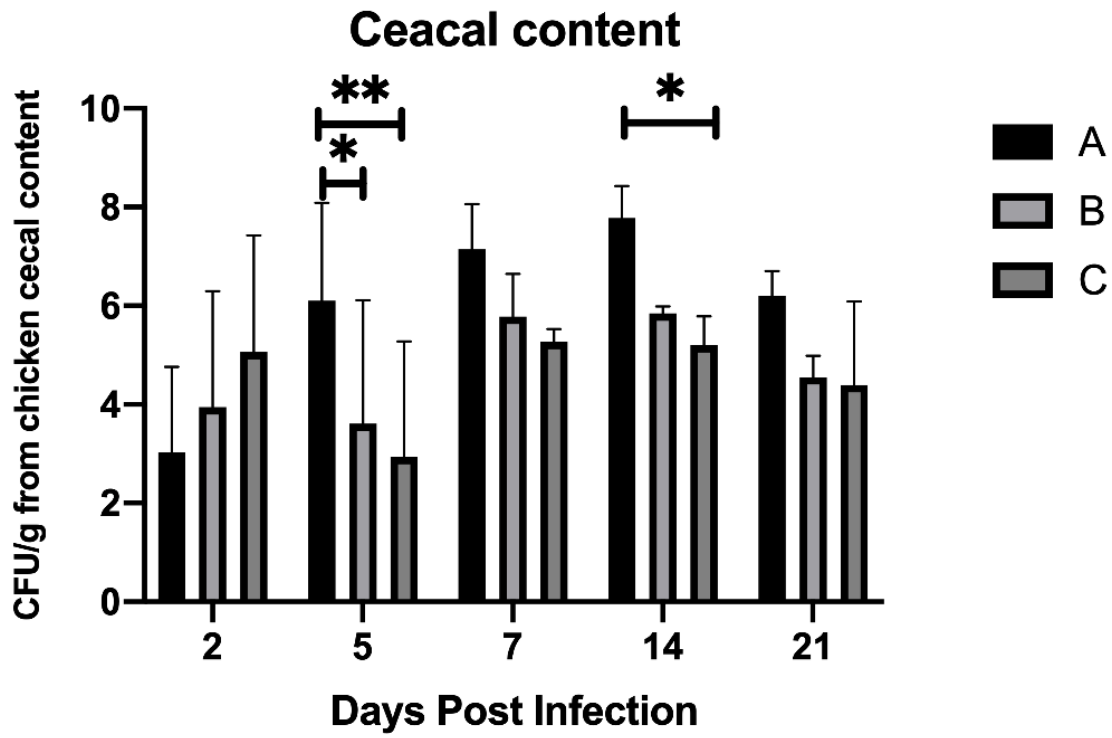

538

539 **Figure 2**

540

541

542

543

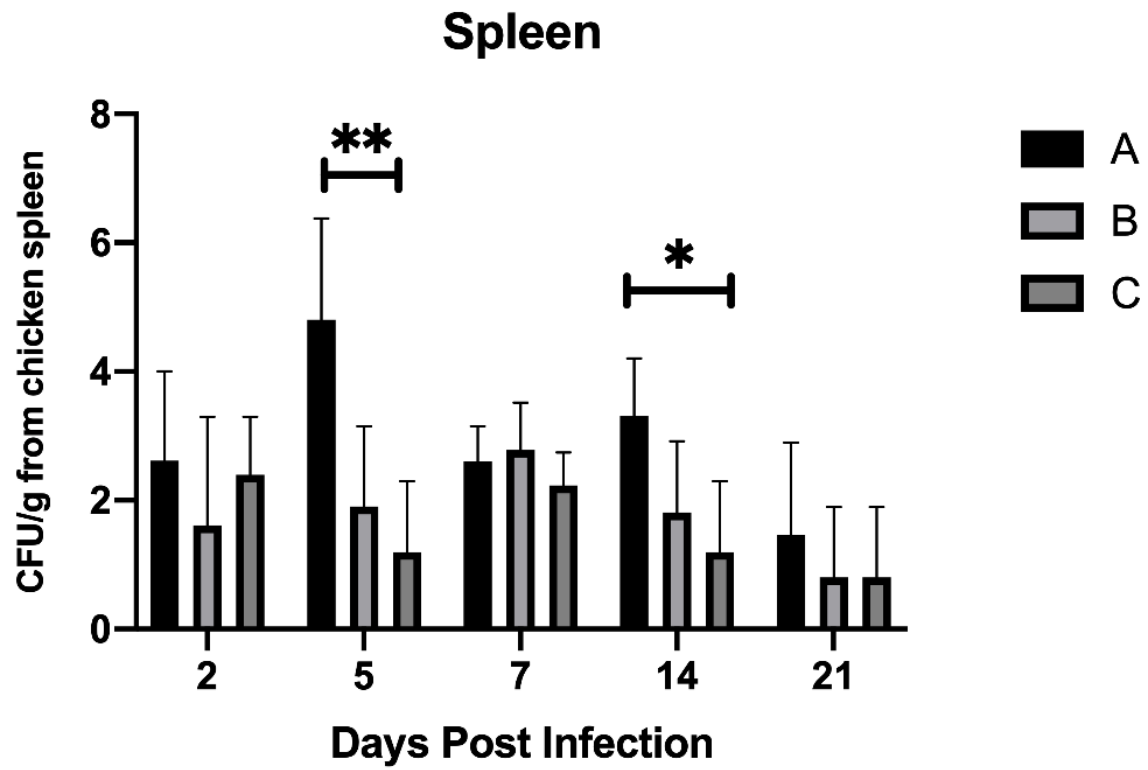

544

545 **Figure 3**

546

547

548

549

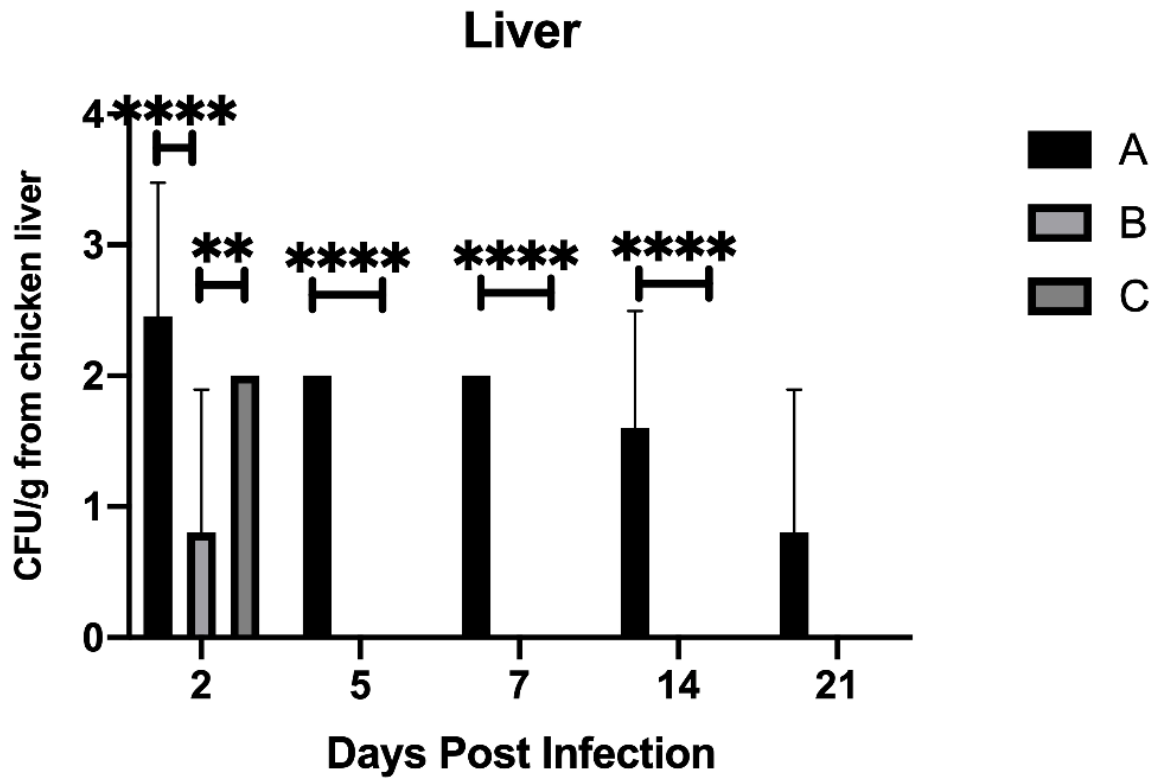

550

551 **Figure 4**

552

553

554

555

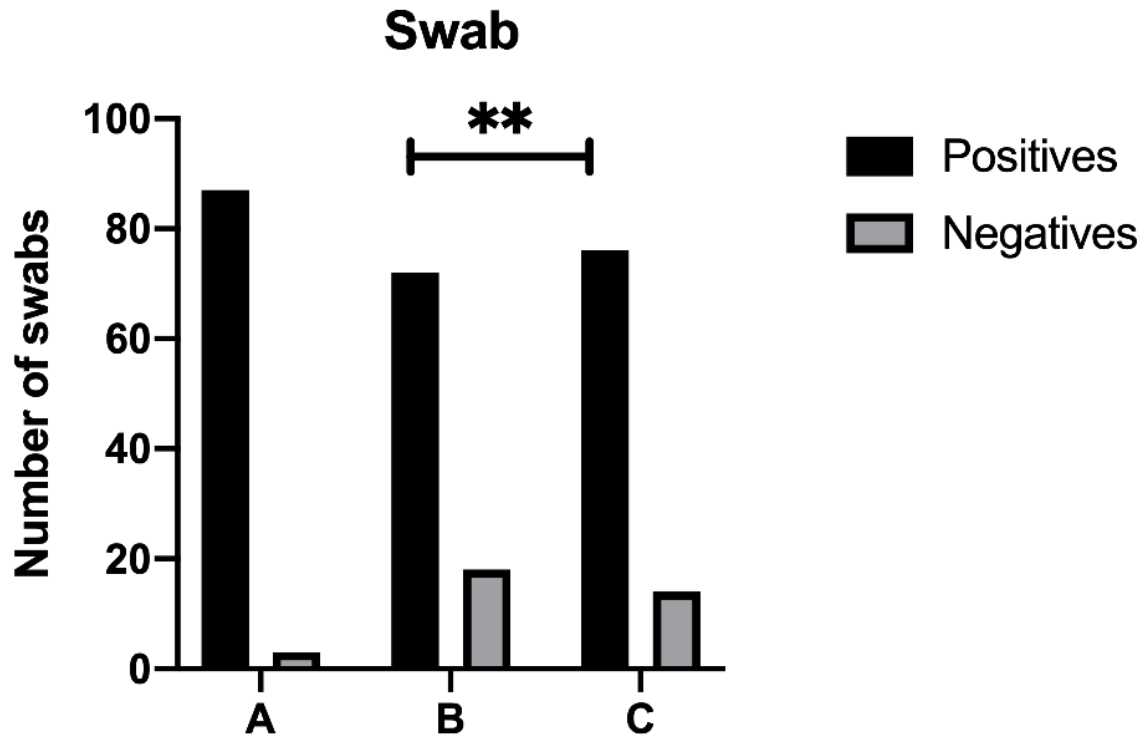

556

557 **Figure 5**

558

559

560

561

562

563

564

565

566

567

568

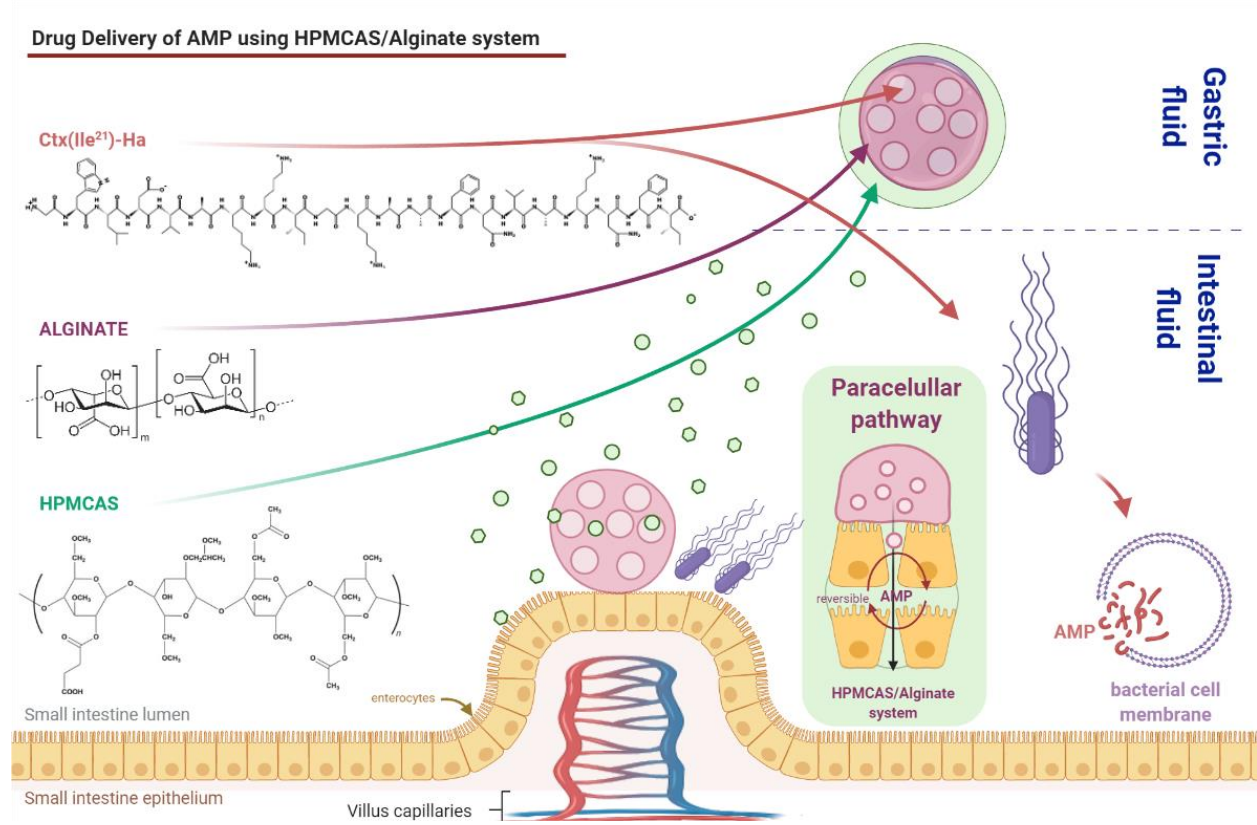

569

570 **Figure 6**

**A**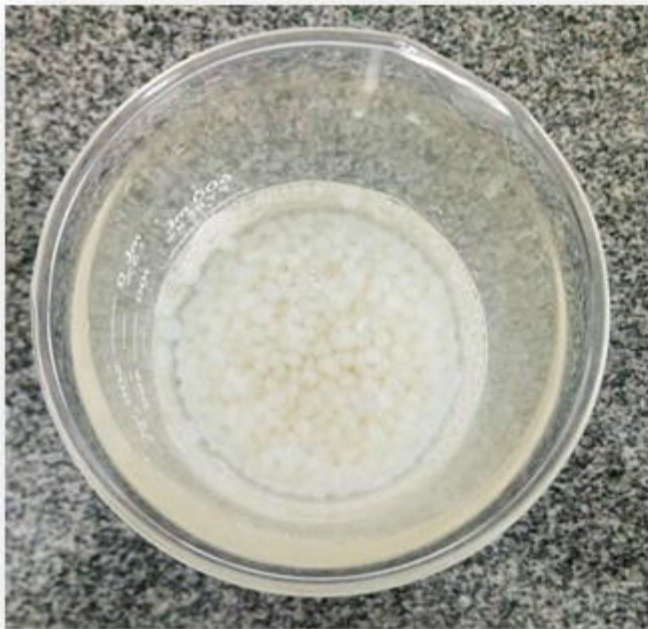**B**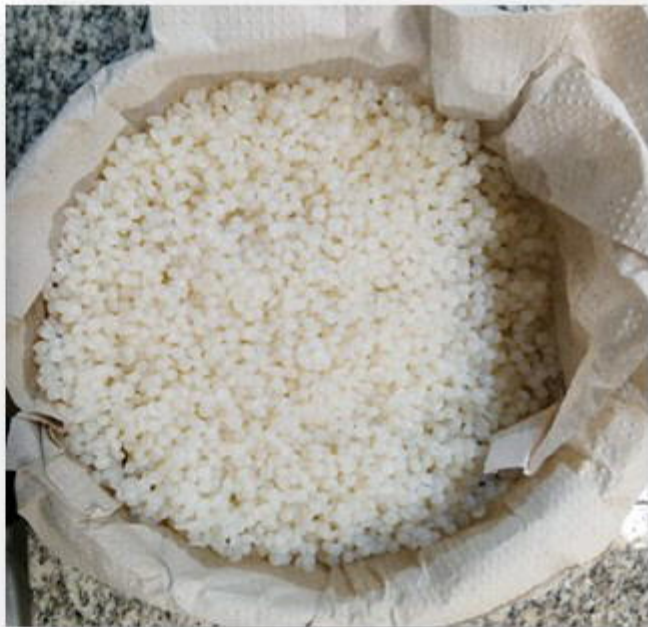**C**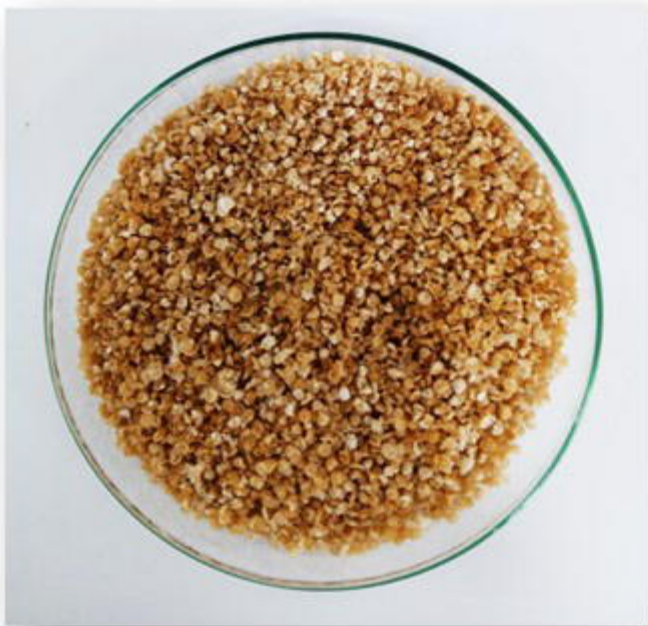**D**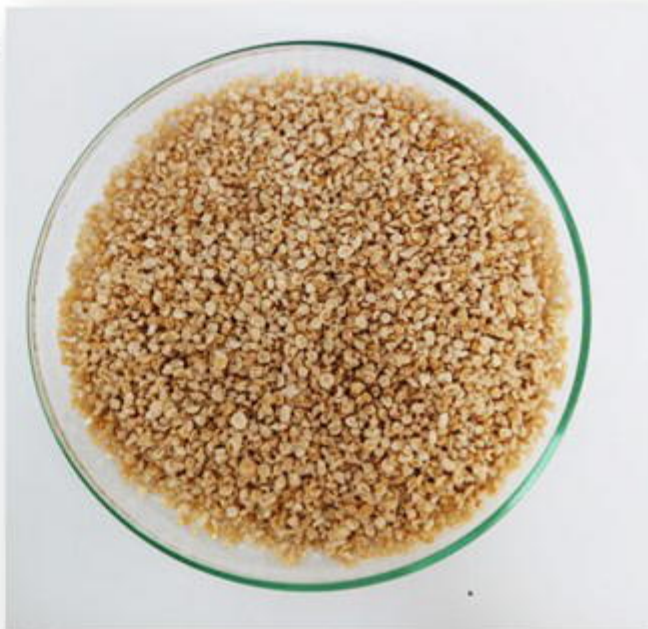

# Cecal content

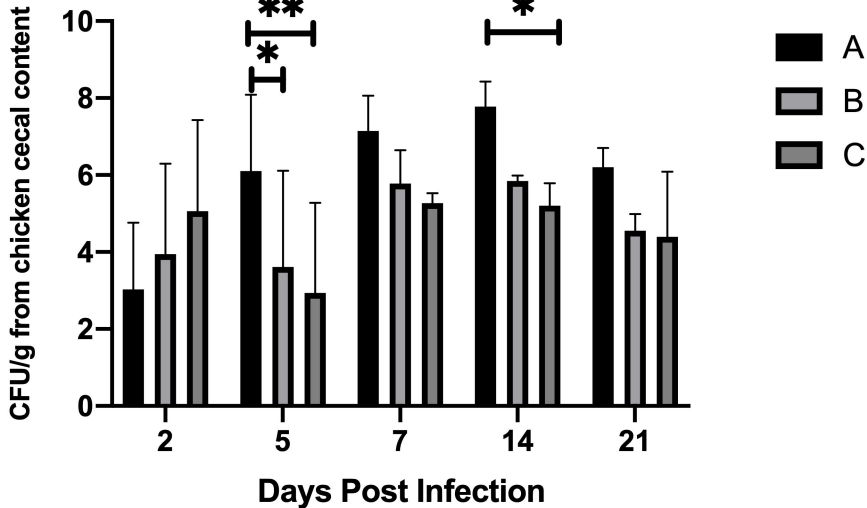



# Spleen

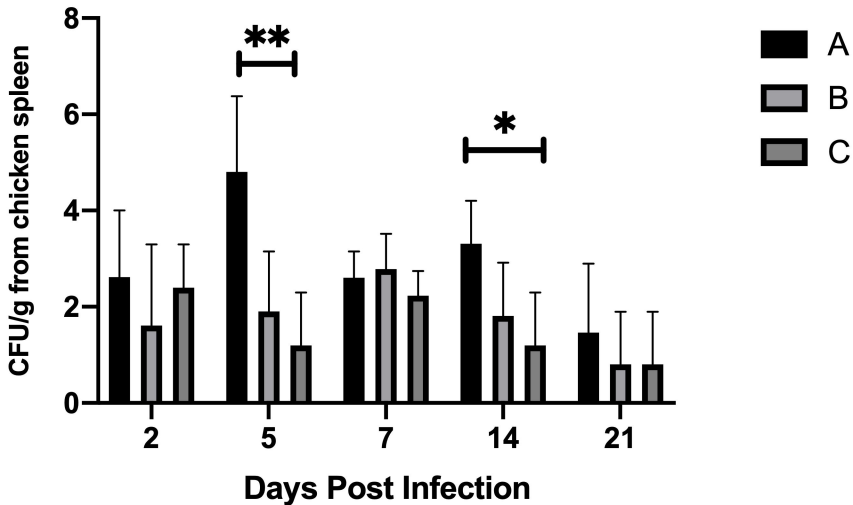

# Liver

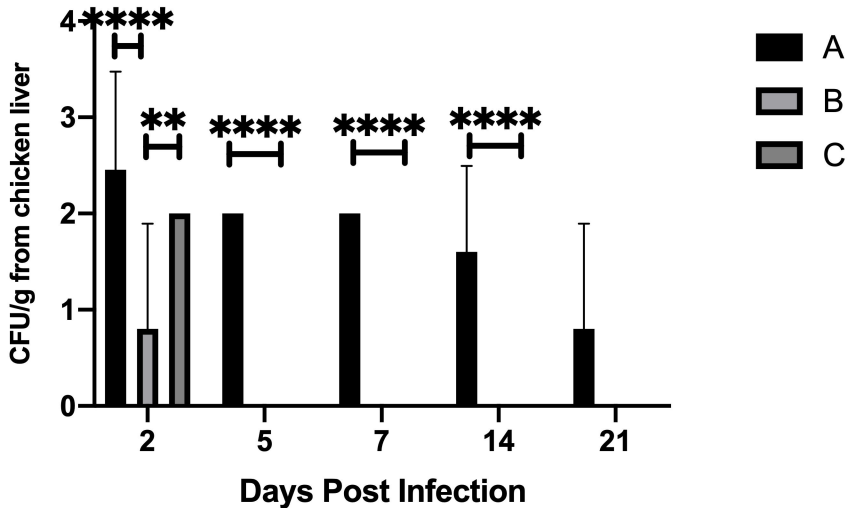

# Swab

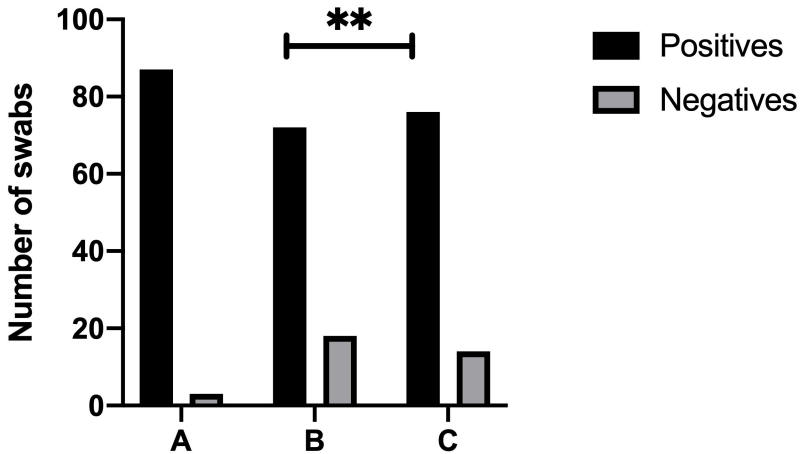

# Drug Delivery of AMP using HPMCAS/Alginate system

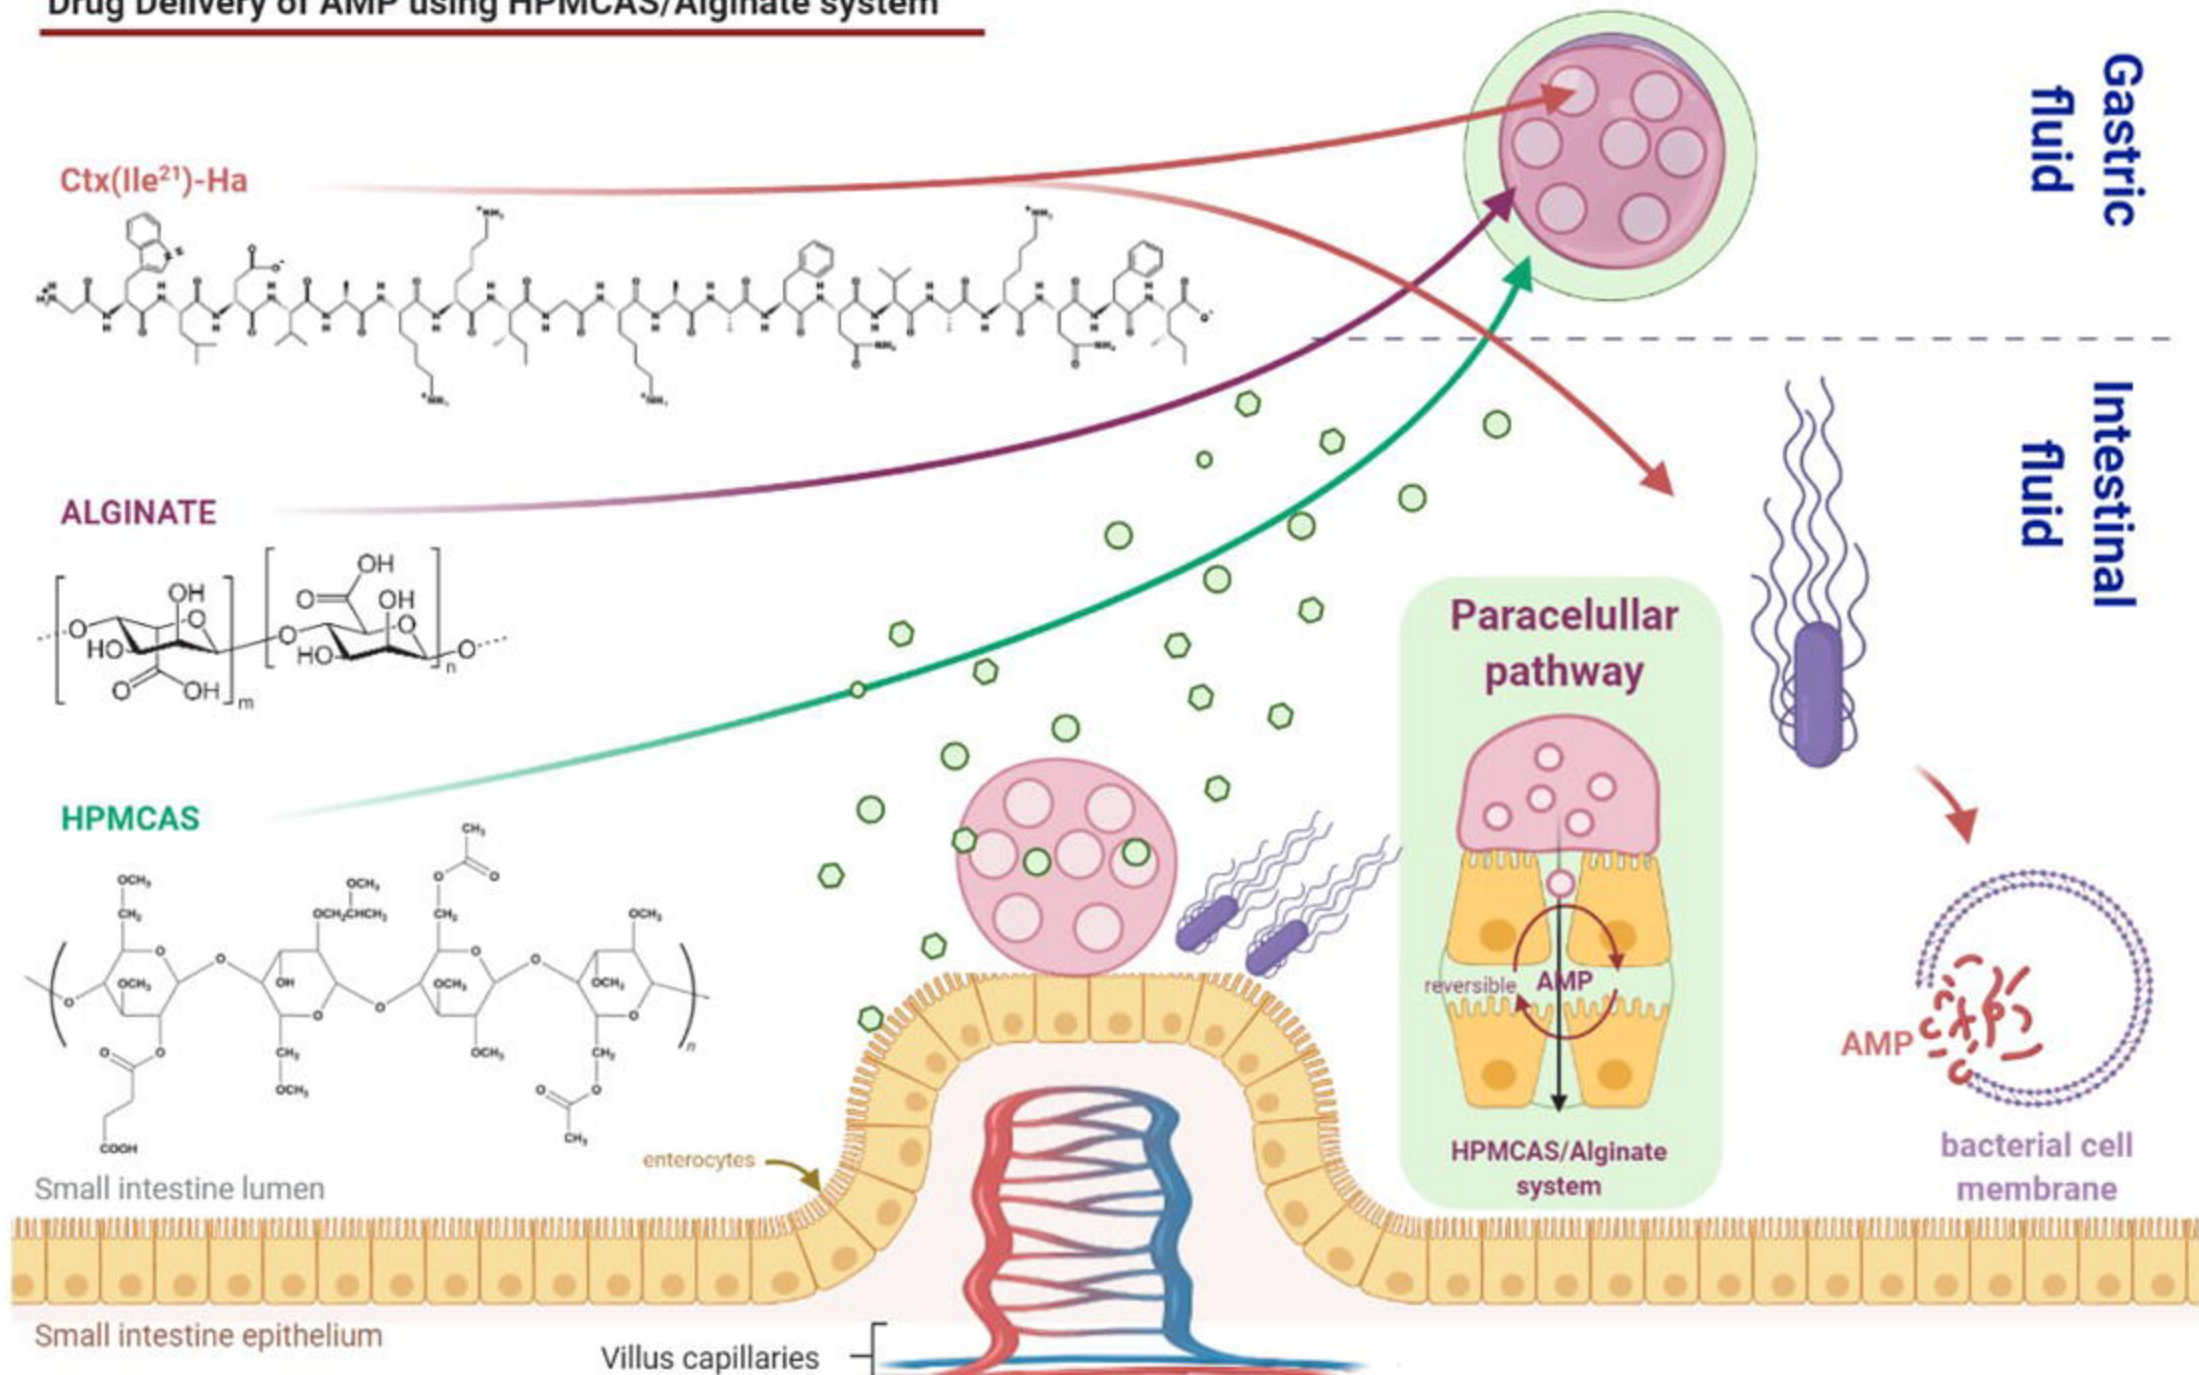

Source: https://www.biorxiv.org/content/10.1101/2021.03.19.436179v1.full.pdf
